# Supplementary material for: Ischemic Bowel Syndrome in Patients with Spinal Cord Injury: A Nationwide Study
Source: PubMed Central journal article supplement (PMC5215787; doi:10.1371/journal.pone.0169070), 2017-01-05
Supplement: pone.0169070.s002.pdf [file pone.0169070.s002.pdf]

S1 Table. ICD-9-CM codes in the study.

| <b>ICD-9-CM codes</b>  | <b>Diagnosis</b>        |
|------------------------|-------------------------|
| 806, 952               | Spinal cord injury      |
| 557.0, 557.1 and 557.9 | Ischemic bowel syndrome |
| 250                    | Diabetes                |
| 401-405                | Hypertension            |
| 272                    | Hyperlipidemia          |
| 491, 492, 496          | COPD                    |
| 428                    | Heart failure           |
| 410-414                | CAD                     |
| 430-438                | Stroke                  |
| 585                    | ESRD                    |
| 427.31                 | AF                      |
