# Supplementary material for: Ischemic Bowel Syndrome in Patients with Spinal Cord Injury: A Nationwide Study
Source: PubMed Central journal article supplement (PMC5215787; doi:10.1371/journal.pone.0169070), 2017-01-05
Supplement: pone.0169070.s003.pdf [file pone.0169070.s003.pdf]

S2 Table. Incidence, and hazard ratio of ischemic bowel syndrome among patients with different level and completeness of spine injuries.

| Variable                   | Event | PY      | Rate <sup>#</sup> | Crude SHR<br>(95% CI) | Adjusted SHR <sup>†</sup><br>(95% CI) |
|----------------------------|-------|---------|-------------------|-----------------------|---------------------------------------|
| Non-SCI                    | 414   | 1032118 | 4.01              | 1(Reference)          | 1(Reference)                          |
| C-Spine complete SCI       | 2     | 3870    | 5.17              | 0.98(0.24, 3.91)      | 1.07(0.27, 4.30)                      |
| C-Spine incomplete SCI     | 26    | 61628   | 4.22              | 0.79(0.54, 1.17)      | 0.90(0.61, 1.33)                      |
| T-Spine complete SCI       | 0     | 1105    | 0.00              | -                     | -                                     |
| T-Spine incomplete SCI     | 3     | 2142    | 14.0              | 2.46(0.79, 7.65)      | 2.52(0.81, 7.85)                      |
| L-S-C-Spine complete SCI   | 0     | 179     | 0.00              | -                     | -                                     |
| L-S-C-Spine incomplete SCI | 10    | 17827   | 5.61              | 1.10(0.59, 2.05)      | 1.12(0.60, 2.10)                      |
| unspecified SCI            | 89    | 137669  | 6.46              | 1.18(0.94, 1.47)      | 1.21(0.96, 1.51)                      |
| Multiple SCI at one visit  | 15    | 18441   | 8.13              | 1.47(0.88, 2.45)      | 1.53(0.92, 2.56)                      |

Rate<sup>#</sup>, incidence rate, per 10,000 person-years; Crude SHR, crude subhazard ratio;

Adjusted SHR<sup>†</sup>: multivariable analysis including age, sex, and co-morbidities (diabetes, hypertension, hyperlipidemia, COPD, heart failure, CAD, stroke, ESRD and AF)

C-Spine complete SCI: 806.01, 806.06, 806.11, 806.16, 952.01, 952.06

C-Spine incomplete SCI: 806.00, 806.02, 806.03, 806.04, 806.05, 806.07, 806.08, 806.09, 806.10, 806.12, 806.13, 806.14, 806.15, 806.17, 806.18, 806.19, 952.00, 952.02, 952.03, 952.04, 952.05, 952.07, 952.08, 952.09

T-Spine complete SCI: 806.21, 806.26, 806.31, 806.36, 952.11, 952.16

T-Spine incomplete SCI: 806.20, 806.22, 806.23, 806.24, 806.25, 806.27, 806.28, 806.29, 806.30, 806.32, 806.33, 806.34, 806.35, 806.37, 806.38, 806.39, 952.10, 952.12, 952.13, 952.14, 952.15, 952.17, 952.18, 952.19

L-S-C-Spine complete SCI: 806.61, 806.71

L-S-C-Spine incomplete SCI: 806.4, 806.5, 806.60, 806.62, 806.69, 806.70, 806.72, 806.79, 952.2, 952.3, 952.4

Unspecified SCI: 806, 806.0, 806.1, 806.2, 806.3, 806.6, 806.7, 806.8, 806.9, 952, 950.0, 952.1, 952.9
